# Supplementary material for: The QTL GNP1 Encodes GA20ox1, Which Increases Grain Number and Yield by Increasing Cytokinin Activity in Rice Panicle Meristems
Source: PubMed Central journal article supplement (PMC5072697; doi:10.1371/journal.pgen.1006386), 2016-10-20
Supplement: pgen.1006386.s001.pdf [file pgen.1006386.s001.pdf]

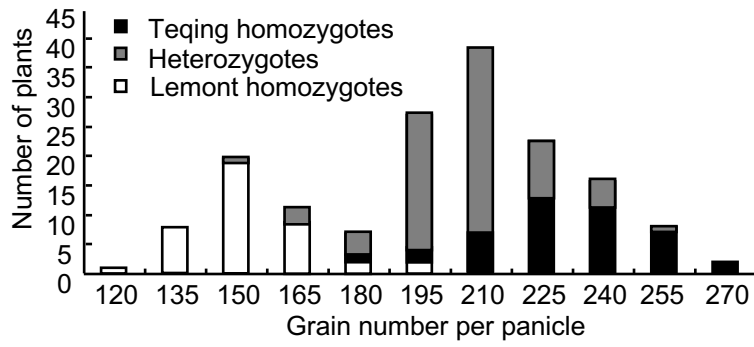

**S1 Fig. Frequency distribution in the BC<sub>5</sub>F<sub>3</sub> population.**

Frequency distribution of grain number per panicle was derived from a near-isogenic line heterozygous for BC<sub>3</sub>F<sub>2</sub> at the RM227–RM85 region and confirmed by BC<sub>3</sub>F<sub>4</sub> family data.
