# Supplementary material for: The QTL GNP1 Encodes GA20ox1, Which Increases Grain Number and Yield by Increasing Cytokinin Activity in Rice Panicle Meristems
Source: PubMed Central journal article supplement (PMC5072697; doi:10.1371/journal.pgen.1006386), 2016-10-20
Supplement: pgen.1006386.s002.pdf [file pgen.1006386.s002.pdf]

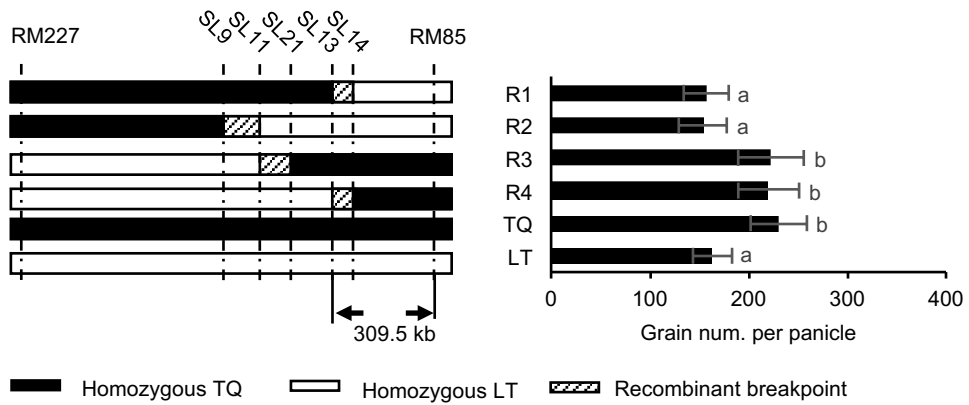

**S2 Fig. High-resolution mapping of the *GNP1* locus.**

Black, white and lightly shaded rectangles indicate the homozygous TQ genotype, homozygous LT genotype and marker intervals containing recombination breakpoints, respectively. Different letters (a, b) indicate significant difference determined by the Fisher's least significant difference (LSD) method at  $p$ -value  $< 0.01$  ( $n = 40$  plants).
