# Supplementary material for: The QTL GNP1 Encodes GA20ox1, Which Increases Grain Number and Yield by Increasing Cytokinin Activity in Rice Panicle Meristems
Source: PubMed Central journal article supplement (PMC5072697; doi:10.1371/journal.pgen.1006386), 2016-10-20
Supplement: pgen.1006386.s003.pdf [file pgen.1006386.s003.pdf]

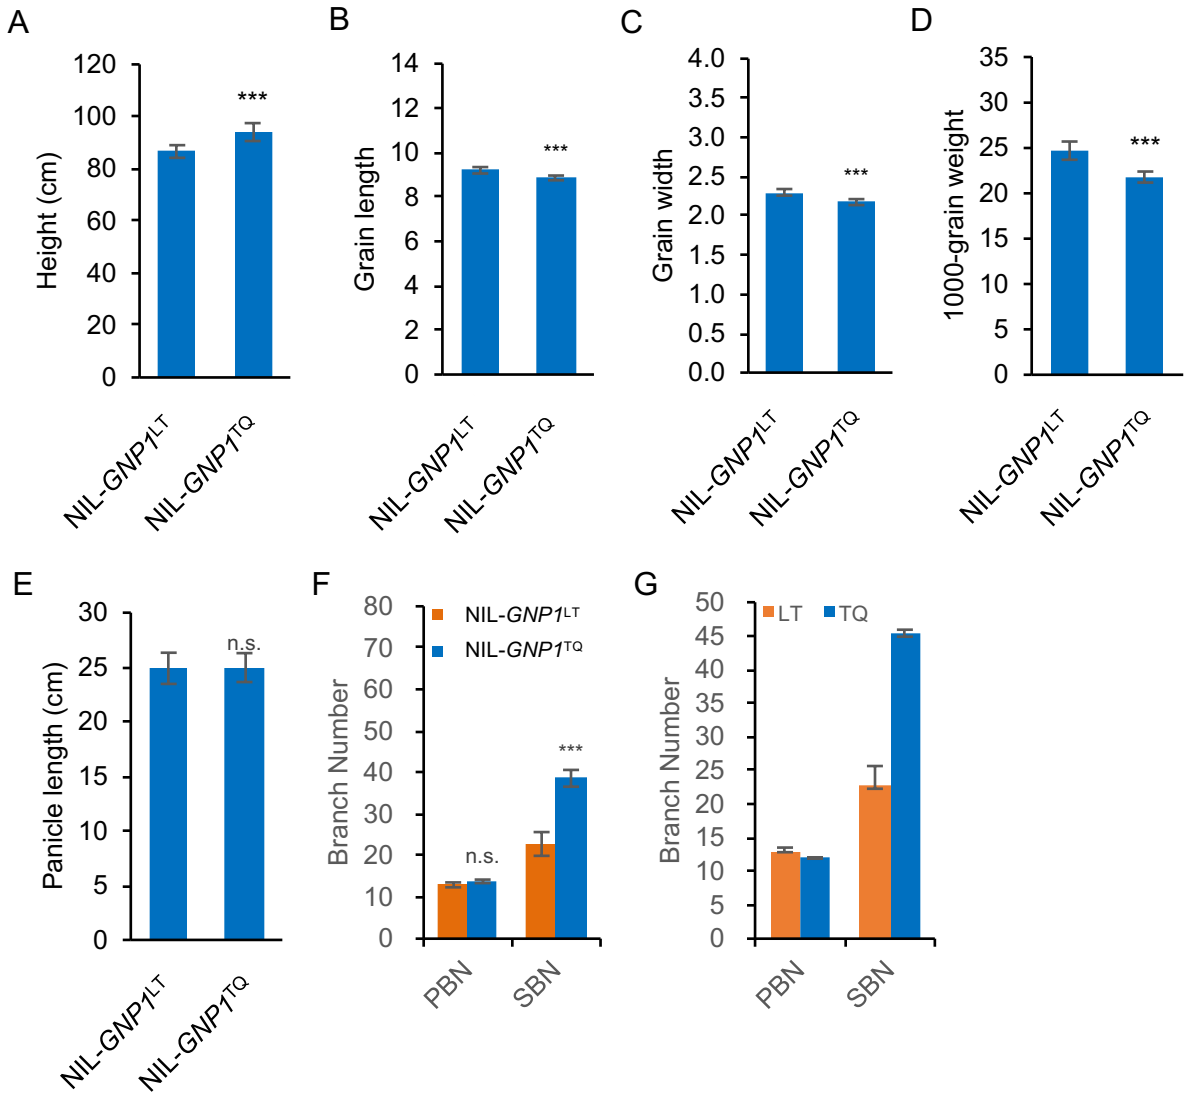

### S3 Fig. Comparison of agronomic traits.

Comparison of (A) plant height, (B) grain length, (C) grain width and (D) 1,000-grain weight and (E) panicle length between NIL-*GNP1*<sup>LT</sup> and NIL-*GNP1*<sup>TQ</sup>. Values are means  $\pm$  s.d. (n = 18). Comparison of (F) primary branch number (PBN) and secondary branch number (SBN) between NIL-*GNP1*<sup>LT</sup> and NIL-*GNP1*<sup>TQ</sup>. Values are means  $\pm$  s.d. (n = 150). Comparison of (G) primary branch number (PBN) and secondary branch number (SBN) between Lemont (LT) and Teqing (TQ). Values are means  $\pm$  s.d. (n = 150).
