# Supplementary material for: The QTL GNP1 Encodes GA20ox1, Which Increases Grain Number and Yield by Increasing Cytokinin Activity in Rice Panicle Meristems
Source: PubMed Central journal article supplement (PMC5072697; doi:10.1371/journal.pgen.1006386), 2016-10-20
Supplement: pgen.1006386.s004.pdf [file pgen.1006386.s004.pdf]

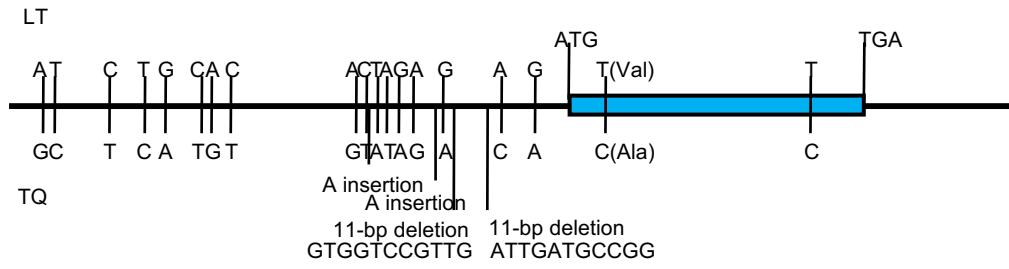

**S4 Fig. Gene structure and mutation sites of *GNPI* in LT and TQ.**  
Blue bar represents the coding region.
