# Supplementary material for: The QTL GNP1 Encodes GA20ox1, Which Increases Grain Number and Yield by Increasing Cytokinin Activity in Rice Panicle Meristems
Source: PubMed Central journal article supplement (PMC5072697; doi:10.1371/journal.pgen.1006386), 2016-10-20
Supplement: pgen.1006386.s005.pdf [file pgen.1006386.s005.pdf]

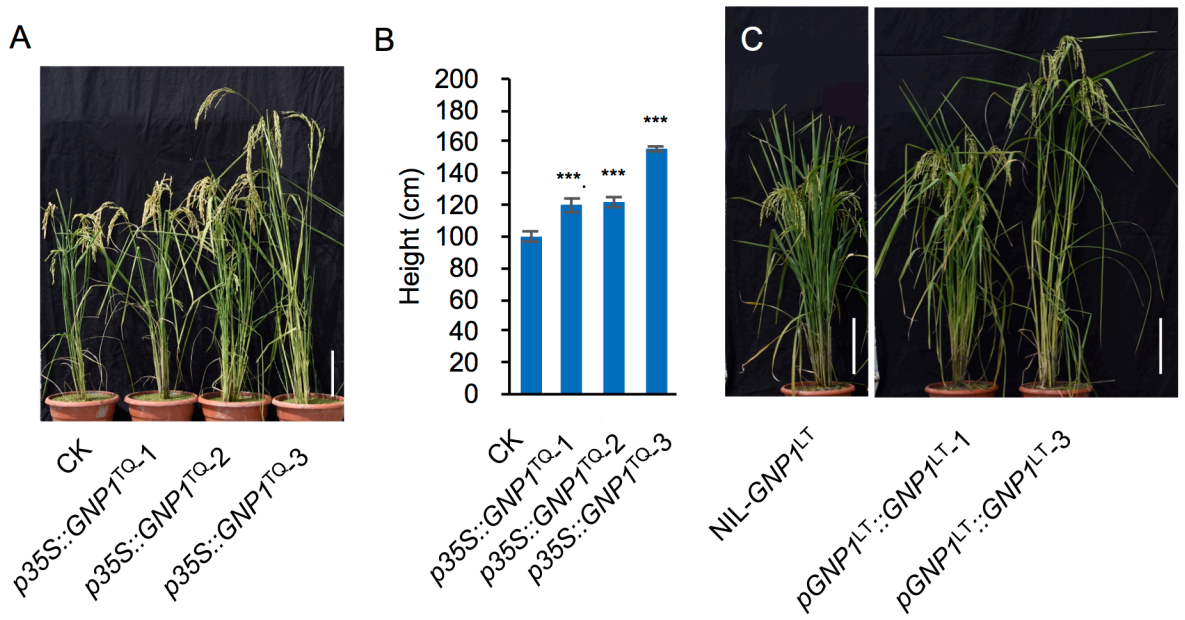

**S5 Fig. Effect of overexpression of *GNP1* in transgenic rice lines.**

(A) Gross morphology of three independent *GNP1*<sup>TQ</sup> overexpression lines and CK (transgenic negative control). Scale bar, 40 cm. (B) Comparison of plant height between three independent *GNP1*<sup>TQ</sup> overexpression lines and CK. Values are means  $\pm$  s.d. (n = 10). (C) Gross morphology of two independent *pGNP1*<sup>LT</sup>::*GNP1*<sup>LT</sup> overexpression lines and the recipient NIL-*GNP1*<sup>LT</sup>. Scale bar, 20 cm. Asterisks represent significant difference determined by Student's t-test at *p*-value < 0.001 (\*\*\*).
