# Supplementary material for: The QTL GNP1 Encodes GA20ox1, Which Increases Grain Number and Yield by Increasing Cytokinin Activity in Rice Panicle Meristems
Source: PubMed Central journal article supplement (PMC5072697; doi:10.1371/journal.pgen.1006386), 2016-10-20
Supplement: pgen.1006386.s006.pdf [file pgen.1006386.s006.pdf]

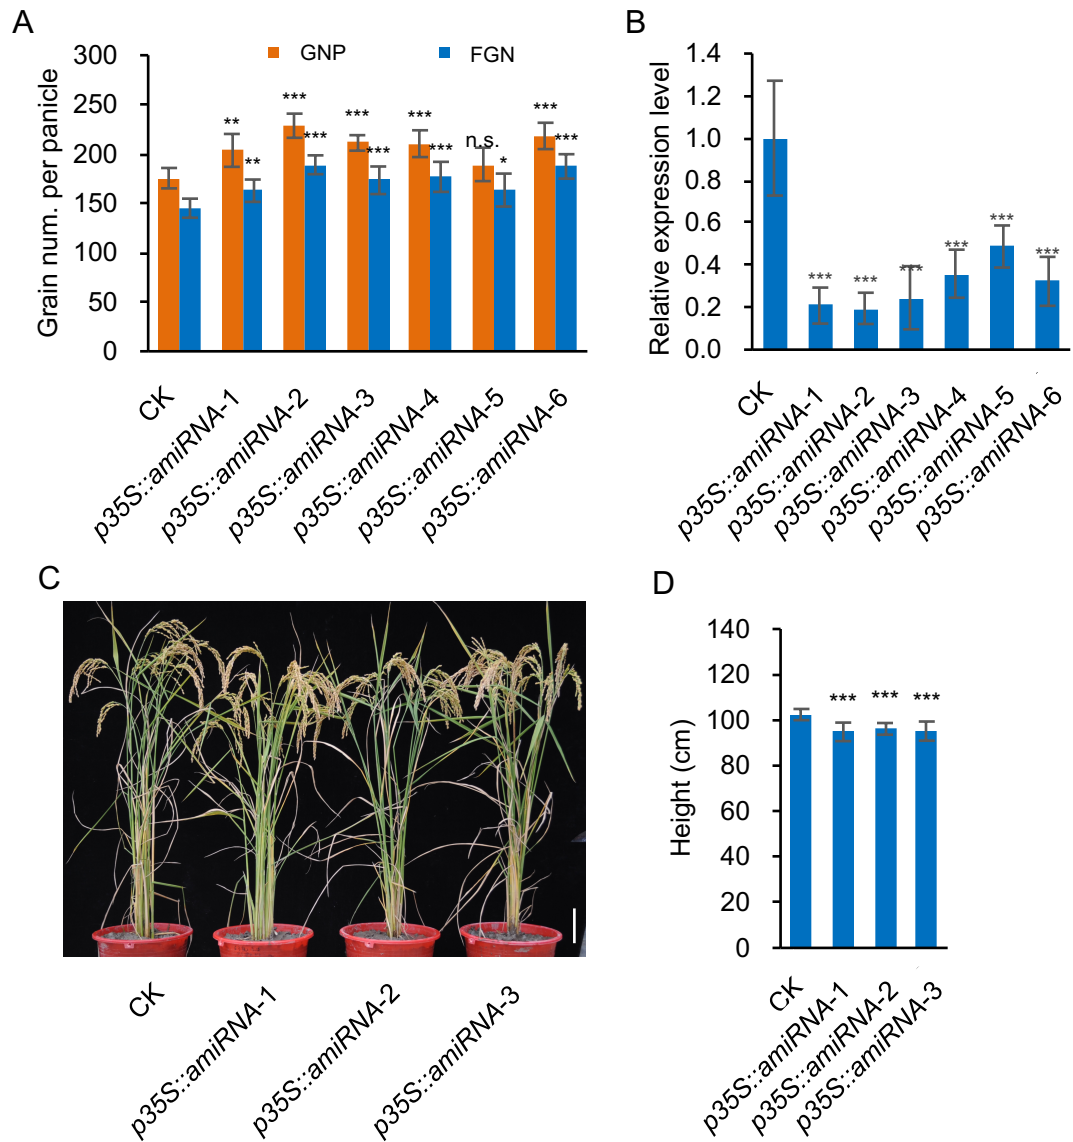

**S6 Fig. Effect of knock-down of *GNPI* in transgenic rice lines.**

(A) Comparison of GNP and FGN between six independent *GNPI* mimic artificial miRNA transgenic lines and CK (transgenic negative control). Values are means  $\pm$  s.d. (n = 10). (B) Relative expression levels of *GNPI* in the flag leaves of six independent *GNPI* mimic artificial miRNA transgenic lines and CK. Values are means  $\pm$  s.d. (n = 4). (C) Gross morphology of three independent *GNPI* mimic artificial miRNA transgenic lines and CK. Scale bar, 10 cm. (D) Comparison of plant height between three independent *GNPI* mimic artificial miRNA transgenic lines and CK. Values are means  $\pm$  s.d. (n = 10). Asterisks represent significant difference determined by Student's t-test at  $p$ -value < 0.001 (\*\*\*),  $p$ -value < 0.01 (\*\*),  $p$ -value < 0.05 (\*), not significant (n.s.).
