# Supplementary material for: The QTL GNP1 Encodes GA20ox1, Which Increases Grain Number and Yield by Increasing Cytokinin Activity in Rice Panicle Meristems
Source: PubMed Central journal article supplement (PMC5072697; doi:10.1371/journal.pgen.1006386), 2016-10-20
Supplement: pgen.1006386.s007.pdf [file pgen.1006386.s007.pdf]

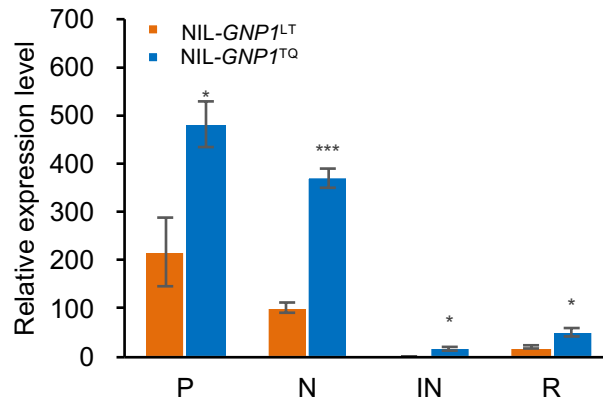

**S7 Fig. Expression patterns of *GNP1* in different tissues at the booting stage.**

P, premature panicle; N, node; IN, internode; R, root. Values are means  $\pm$  s.d. ( $n = 3$ , each with 4 plants). Asterisks represent significant difference determined by Student's t-test at  $p$ -value  $< 0.001$  (\*\*\*),  $p$ -value  $< 0.05$  (\*).
