# Supplementary material for: The QTL GNP1 Encodes GA20ox1, Which Increases Grain Number and Yield by Increasing Cytokinin Activity in Rice Panicle Meristems
Source: PubMed Central journal article supplement (PMC5072697; doi:10.1371/journal.pgen.1006386), 2016-10-20
Supplement: pgen.1006386.s008.pdf [file pgen.1006386.s008.pdf]

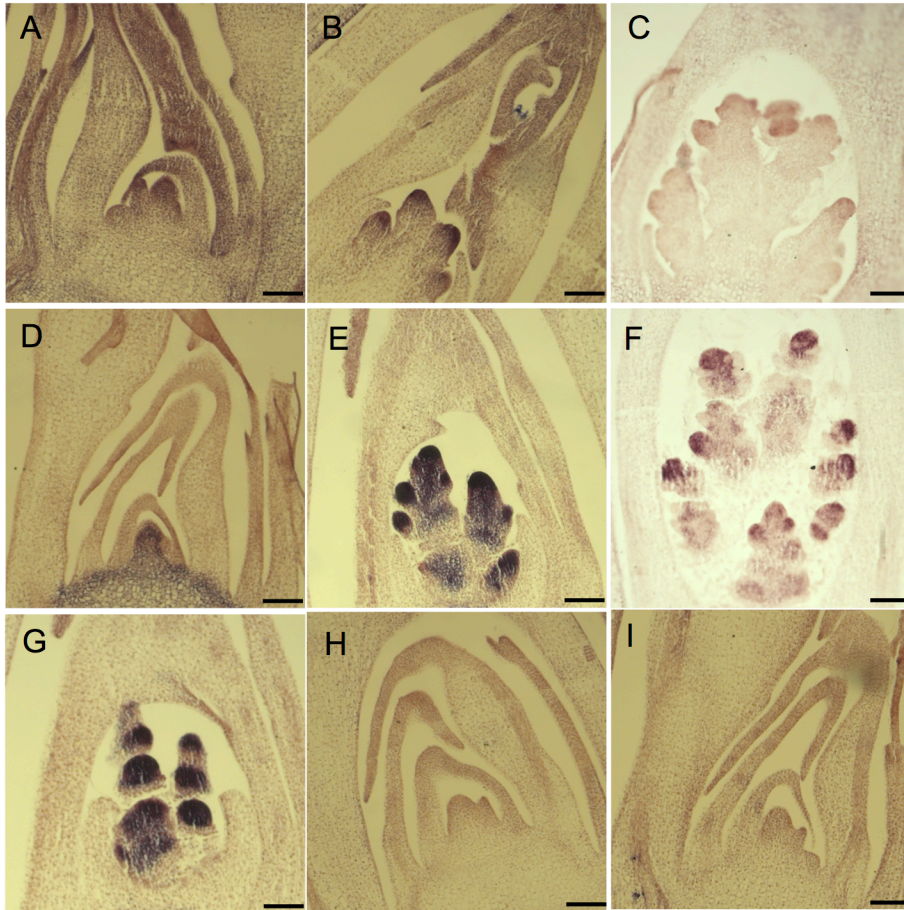

**S8 Fig. Expression of *GNPI* in reproductive meristems.**

(A–C) In situ hybridization using an antisense probe for *GNPI* in NIL-*GNPI*<sup>LT</sup> reproductive meristems at different stages. (A), early stage, with no observable branch meristems at 4 weeks after transplanting; (B), 5 weeks after transplanting, with branch meristems beginning to form. (C), 6 weeks after transplanting, with more branch meristems observed. Scale bar, 100  $\mu$ m. (D–F) In situ hybridization using an antisense probe for *OSHI* in NIL-*GNPI*<sup>LT</sup> reproductive meristems at different stages. (D), early stage, with no observable branch meristems at 4 weeks after transplanting; (E), 5 weeks after transplanting, with branch meristem beginning to form; (F), 6 weeks after transplanting, with more branch meristems observed. Scale bar, 100  $\mu$ m. (G) In situ hybridization using an antisense probe for *OSHI* in NIL-*GNPI*<sup>TQ</sup> reproductive meristems at the same stage as that in (E). (H) In situ hybridization using a sense probe for *GNPI* at early stages. Scale bar, 100  $\mu$ m. (I) In situ hybridization using a sense probe for *OSHI* at early stages. Scale bar, 100  $\mu$ m.
