# Supplementary material for: The QTL GNP1 Encodes GA20ox1, Which Increases Grain Number and Yield by Increasing Cytokinin Activity in Rice Panicle Meristems
Source: PubMed Central journal article supplement (PMC5072697; doi:10.1371/journal.pgen.1006386), 2016-10-20
Supplement: pgen.1006386.s009.pdf [file pgen.1006386.s009.pdf]

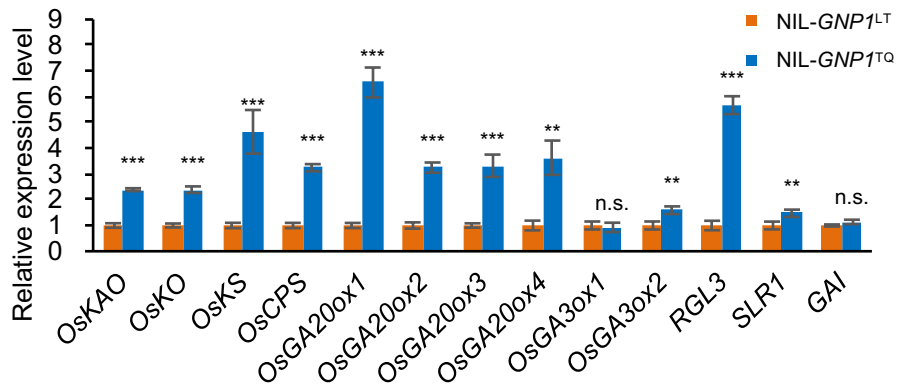

**S9 Fig. Relative expression levels of rice GA biosynthesis-related and signal transduction-related genes in young NIL-*GNP1*<sup>LT</sup> and NIL-*GNP1*<sup>TQ</sup> panicles (~1 cm) at early panicle initiation to booting stage.**

Values are means  $\pm$  s.d. (n = 4, each with 6 plants). Asterisks represent significant difference determined by Student's t-test at  $p$ -value < 0.001 (\*\*\*),  $p$ -value < 0.01 (\*\*), not significant (n.s.).
