# Supplementary material for: The QTL GNP1 Encodes GA20ox1, Which Increases Grain Number and Yield by Increasing Cytokinin Activity in Rice Panicle Meristems
Source: PubMed Central journal article supplement (PMC5072697; doi:10.1371/journal.pgen.1006386), 2016-10-20
Supplement: pgen.1006386.s010.pdf [file pgen.1006386.s010.pdf]

**S1 Table. QTLs affecting Grain Number per Panicle (GNP) detected in the reciprocal introgression lines (ILs) in Beijing and Sanya.**

| Population                  | Marker interval <sup>1)</sup> | Environment <sup>2)</sup> | Chr          | GNP                  |             |              |             |
|-----------------------------|-------------------------------|---------------------------|--------------|----------------------|-------------|--------------|-------------|
|                             |                               |                           |              | QTL                  | LOD         | <i>A</i>     | PVE(%)      |
| TQ-ILs                      | <u>RM128</u> -OSR23           | SY                        | 1            | <i>QGnp1</i>         | 4.69        | -13.9        | 5.3         |
|                             | <u>RM227</u> - <u>RM85</u>    | <b>BJ</b>                 | <b>3</b>     | <b><i>QGnp3b</i></b> | <b>3.04</b> | <b>-19.5</b> | <b>4.3</b>  |
|                             |                               | <b>SY</b>                 |              |                      | <b>6.54</b> | <b>-19.8</b> | <b>11.3</b> |
|                             | <u>RM255</u> -RM348           | BJ                        | 4            | <i>QGnp4b</i>        | 6.86        | 19.3         | 10.7        |
|                             |                               | SY                        |              |                      | 3.39        | 13.7         | 4           |
|                             | RM289- <u>RM163</u>           | BJ                        | 5            | <i>QGnp5</i>         | 5.14        | 16.8         | 8.5         |
|                             | RM439- <u>RM141</u>           | SY                        | 6            | <i>QGnp6b</i>        | 2.22        | 28.8         | 5.6         |
|                             | <u>RM210</u> -RM556           | BJ                        | 8            | <i>QGnp8b</i>        | 4.35        | -16.5        | 6.1         |
|                             |                               | SY                        |              |                      | 3.35        | -19.4        | 7.6         |
|                             | <u>RM147</u> - <u>RM590</u>   | SY                        | 10           | <i>QGnp10</i>        | 10.35       | -22.3        | 12.9        |
| LT-ILs                      | RM112- <u>RM208</u>           | SY                        | 2            | <i>QGnp2</i>         | 5.43        | -18.5        | 9.8         |
|                             | RM81B- <u>RM231</u>           | BJ                        | 3            | <i>QGnp3a</i>        | 8.87        | -25.3        | 12.7        |
|                             | <u>RM227</u> - <u>RM85</u>    | <b>BJ</b>                 | <b>3</b>     | <b><i>QGnp3b</i></b> | <b>9.59</b> | <b>-14.6</b> | <b>11.6</b> |
|                             |                               | <b>SY</b>                 |              |                      | <b>7.36</b> | <b>-21.5</b> | <b>12.5</b> |
|                             | <u>RM255</u> -RM348           | BJ                        | 4            | <i>QGnp4b</i>        | 14.62       | 21.3         | 23          |
|                             |                               | SY                        |              |                      | 6.1         | 26.2         | 12.2        |
|                             | RM204- <u>RM225</u>           | SY                        | 6            | <i>QGnp6a</i>        | 4.84        | -17.2        | 7.2         |
|                             | RM439- <u>RM141</u>           | SY                        | 6            | <i>QGnp6b</i>        | 5.37        | -17.5        | 8.7         |
|                             | RM339- <u>RM223</u>           | BJ                        | 8            | <i>QGnp8a</i>        | 4.97        | 14.4         | 6.4         |
|                             |                               | SY                        |              |                      | 2.62        | 14.6         | 6.5         |
| <u>RM242</u> - <u>RM278</u> | SY                            | 9                         | <i>QGnp9</i> | 4.11                 | 16.4        | 6.4          |             |

1) The underlined markers are those closer to the putative QTL.

2) BJ: Beijing, SY: Sanya

3) The QTL additive effect results from substitution of a Teqing (TQ) allele by a Lemont (LT) allele.
