# Supplementary material for: The QTL GNP1 Encodes GA20ox1, Which Increases Grain Number and Yield by Increasing Cytokinin Activity in Rice Panicle Meristems
Source: PubMed Central journal article supplement (PMC5072697; doi:10.1371/journal.pgen.1006386), 2016-10-20
Supplement: pgen.1006386.s011.pdf [file pgen.1006386.s011.pdf]

**S2 Table. The effect of *GNPI* revealed in the BC<sub>5</sub>F<sub>3</sub> population derived from a near-isogenic line with BC<sub>5</sub>F<sub>2</sub> heterozygous at the RM227–RM85 region and confirmed by BC<sub>5</sub>F<sub>4</sub> family data.**

| Genotype |                | Plant number | X <sup>2</sup> (1:2:1) | Phenotype | Additive effect | Dominant effect |
|----------|----------------|--------------|------------------------|-----------|-----------------|-----------------|
|          | LT homozygotes | 41           |                        | 154.3     |                 |                 |
| GNP      | Heterozygotes  | 80           |                        | 203.4     |                 |                 |
|          | TQ homozygotes | 42           | 0.07                   | 229.6     | 37.7            | 11.5            |
