# Supplementary material for: The QTL GNP1 Encodes GA20ox1, Which Increases Grain Number and Yield by Increasing Cytokinin Activity in Rice Panicle Meristems
Source: PubMed Central journal article supplement (PMC5072697; doi:10.1371/journal.pgen.1006386), 2016-10-20
Supplement: pgen.1006386.s012.pdf [file pgen.1006386.s012.pdf]

**S3 Table. Performance of agronomic traits for NIL-*GNPI*<sup>TQ</sup> and isogenic control (Lemont) across different environments.**

| Env. | Genotype                       | PH       | PNP   | HD   |
|------|--------------------------------|----------|-------|------|
| BJ   | Lemont                         | 86.9     | 9.6   | 98.7 |
|      | NIL- <i>GNPI</i> <sup>TQ</sup> | 95.1**   | 8.1** | 99.8 |
| NN   | Lemont                         | 90.7     | 4.9   | 80.7 |
|      | NIL- <i>GNPI</i> <sup>TQ</sup> | 96.9*    | 4.9   | 81.6 |
| JZ   | Lemont                         | 97.7     | 10.7  | 97.1 |
|      | NIL- <i>GNPI</i> <sup>TQ</sup> | 110.3*** | 11.3  | 95.6 |
| PX   | Lemont                         | 93.9     | 12.6  | 90.2 |
|      | NIL- <i>GNPI</i> <sup>TQ</sup> | 102*     | 11.5  | 88.7 |
| SY   | Lemont                         | 89.8     | 10.1  | 88.9 |
|      | NIL- <i>GNPI</i> <sup>TQ</sup> | 98.4**   | 8.6** | 87.5 |

PH: plant height (cm), PNP: panicles per plant, HD: heading date (d), BJ: Beijing, NN: Nanning, JZ: Jingzhou, PX: Pingxiang, SY: Sanya.

\*, \*\* and \*\*\* represent significance differences at  $p$ -value  $\leq$  0.05, 0.01, and 0.001, respectively.
