# Supplementary material for: The QTL GNP1 Encodes GA20ox1, Which Increases Grain Number and Yield by Increasing Cytokinin Activity in Rice Panicle Meristems
Source: PubMed Central journal article supplement (PMC5072697; doi:10.1371/journal.pgen.1006386), 2016-10-20
Supplement: pgen.1006386.s013.pdf [file pgen.1006386.s013.pdf]

**S4 Table. Oligo sequences used for genotyping the progeny of *gnp1-D* T-DNA insertional line.**

| Name | Sequence 5'-3'            |
|------|---------------------------|
| LP   | TTCGCAAATTTGTGTGAAGC      |
| RP   | AAGTACTCATCCCCAGCAGC      |
| RBP  | CCACAGTTTTTCGCGATCCAGACTG |
