# Supplementary material for: The QTL GNP1 Encodes GA20ox1, Which Increases Grain Number and Yield by Increasing Cytokinin Activity in Rice Panicle Meristems
Source: PubMed Central journal article supplement (PMC5072697; doi:10.1371/journal.pgen.1006386), 2016-10-20
Supplement: pgen.1006386.s014.pdf [file pgen.1006386.s014.pdf]

**S5 Table. Insertion and deletion (Indel) and cleaved amplified polymorphic sequences (CAPS) markers developed.**

| Marker | Marker type | Forward primer(5'-3')  | Reverse primer(5'-3') | Restriction enzyme |
|--------|-------------|------------------------|-----------------------|--------------------|
| SL9    | Indel       | GAAAATCCACTTGCTCCC     | CATCCTTCCATACCTGTTAGA |                    |
| SL11   | Indel       | CAACATACACTCAAATTCCTG  | ACGTCAGCACAACACCCA    |                    |
| SL21   | Indel       | CCCAACTAAACCAGACCTT    | CTCCAAAACCTATCCTATGC  |                    |
| SL13   | Indel       | AGTAGCAGAGGACGAAGAAT   | GTCGTGTTTTGAGTCGGT    |                    |
| SL14   | Indel       | CTCATAATCGTTGCTACTCATC | CATGCAGACACGGAAATAC   |                    |
| SL65   | Indel       | GCGTATTAAGTGGTGGCA     | CACGTCCTGAGTCTTATTGG  |                    |
| SL54   | CAPS        | CTCCAAATAGGCCAACAA     | ATACATCCCGTGCTTCGT    | BsmAI              |
| SL42   | Indel       | TAGAACCTGATTCACCCAA    | TCTTTCTTGCAGCCGAAT    |                    |
| SL40   | Indel       | TGAGGTGGTGCCTAAAC      | AGGAAGCCCTGTGATTGG    |                    |
