# Supplementary material for: The QTL GNP1 Encodes GA20ox1, Which Increases Grain Number and Yield by Increasing Cytokinin Activity in Rice Panicle Meristems
Source: PubMed Central journal article supplement (PMC5072697; doi:10.1371/journal.pgen.1006386), 2016-10-20
Supplement: pgen.1006386.s015.pdf [file pgen.1006386.s015.pdf]

**S6 Table. Oligo sequences used for transgenic plasmid construction.**

| Name                  | Sequence 5'-3'                             | Restriction Enzyme Set PCR Product vs (Plasmid) |
|-----------------------|--------------------------------------------|-------------------------------------------------|
| 1. overexpression     |                                            |                                                 |
| GNP1OEF               | ATGAGCATGGTGGTGCAGCAG                      | (SmaI)                                          |
| GNP1OEF               | ACGCGCCATGGTACTAGGAGTATATTGTTGGTTGCAGGTGAC | NcoI(NcoI)                                      |
| 2. amiRNAi            |                                            |                                                 |
| GNP1-miR-s            | agTATATATCTAAGCCGGAGCTAcaggagattcagttga    |                                                 |
| GNP1-miR-a            | tgTAGCTCCGGCTTAGATATATActgctgctgctacagcc   |                                                 |
| GNP1-miR*s            | ctTAGCTGCGGGTTAGATATATAAttcctgctgctaggctg  |                                                 |
| GNP1-miR*a            | aaTATATATCTAACCCGCAGCTAagagaggcaaaagtga    |                                                 |
| primer G-11491        | TCGGTACCCAGCAGCAGCCACAGCAAAA               | KpnI(KpnI)                                      |
| primer G-11494        | TCTCTAGAGCTGCTGATGCTGATGCCAT               | XbaI(XbaI)                                      |
| 3. complementary test |                                            |                                                 |
| GNP1pf                | ACGCGGAGCTCGCTGTTGCGATGGTTGAGACGA          | SacI(SacI)                                      |
| GNP1pr                | CCATATGAACTGCGACGGGATCTC                   |                                                 |
| GNP1cf                | GAGATCCCGTCGCAGTTCATATGG                   |                                                 |
| GNP1cr                | ACGCGACGCGTATCGCACCGTGTTCGGTCC             | MluI(MluI)                                      |
