# Supplementary material for: The QTL GNP1 Encodes GA20ox1, Which Increases Grain Number and Yield by Increasing Cytokinin Activity in Rice Panicle Meristems
Source: PubMed Central journal article supplement (PMC5072697; doi:10.1371/journal.pgen.1006386), 2016-10-20
Supplement: pgen.1006386.s016.pdf [file pgen.1006386.s016.pdf]

S7 Table. Oligo sequences used for real-time PCR.

| Name       | Sequence 5'-3'             | Locus ID       |
|------------|----------------------------|----------------|
| ACTINf     | TGCTATGTACGTCGCCATCCAG     | LOC_Os03g50885 |
| ACTINr     | AATGAGTAACCACGCTCCGTCA     |                |
| UBIQUITINf | GACGGACGCACCCCTGGCTGACTAC  | LOC_Os03g13170 |
| UBIQUITINr | TGCTGCCAATTACCATATACCACGAC |                |
| OSH1f      | GCTACCTGAGATTGATGCACA      | LOC_Os03g51690 |
| OSH1r      | CCACCTTCTGACTCTCCGA        |                |
| OSH6f      | TCCTCCGACGAAGACCAG         | LOC_Os01g19694 |
| OSH6r      | TTATCTTCTTCCGTGGGATATGGC   |                |
| OSH15f     | CAAGATCATGGCGCACCC         | LOC_Os07g03770 |
| OSH15r     | GTACGCCTCCATGAACTGGTC      |                |
| OSH43f     | ATCAGCTCGATCAGTTCATGG      | LOC_Os03g56110 |
| OSH43r     | TGCTTCAGCTGCTTGTCAC        |                |
| OSH71f     | CTGGTGGAAACACACATTACCGTTG  | LOC_Os05g03884 |
| OSH71r     | GAACCGCATGTCTCCGAT         |                |
| OsIPT3f    | CCCTACTGACGCACGGAGA        | LOC_Os05g24660 |
| OsIPT3r    | GCCTCCACCTTCAACTCCA        |                |
| OsIPT6f    | GTGGGGAAGTGGTAAATGCTGA     | LOC_Os07g09220 |
| OsIPT6r    | GTGACCACGTCTGGCAAT         |                |
| OsIPT7f    | GCAGGTGTCCAAGATCCG         | LOC_Os05g47840 |
| OsIPT7r    | ATGGCGTACAGGTAGTCGTTG      |                |
| OsIPT8f    | CGGGGAAGACCAAGCTTT         | LOC_Os01g49390 |
| OsIPT8r    | GAGCGACACCTTGTTCTG         |                |
| OsIPT9f    | ATGAATCCACAGGTGCCCTA       | LOC_Os01g73760 |
| OsIPT9r    | GTTACACACTTCATCTAGCAGG     |                |
| OsIPT10f   | CCAACCAAGCCGATCAACC        | LOC_Os06g51350 |
| OsIPT10r   | TTCATGCCAGGACTCAAGC        |                |
| LOGf       | GGCCCAACTAGGAATCCAC        | LOC_Os01g40630 |
| LOGr       | TGATCGTCCCAAACCAAGC        |                |
| OsRR1f     | CTTCGCTGGAGTTGCCAT         | LOC_Os04g36070 |
| OsRR1r     | TCAAGCACACCACAGGTT         |                |
| OsRR2f     | GACATCGTGCTGACCGACT        | LOC_Os02g35180 |
| OsRR2r     | ATCGTTCATCTTGAGAGGCTT      |                |
| OsRR3f     | CGGAGATGACAGGGTTCG         | LOC_Os02g58350 |
| OsRR3r     | ATTCATGATGACGCGGTTG        |                |
| OsRR4f     | CACCAGATAAGCCGCCACA        | LOC_Os01g72330 |
| OsRR4r     | TGGAGACAATCTTGCTT          |                |
| OsRR5f     | GGGAAGAGGGCATTGGAG         | LOC_Os04g44280 |
| OsRR5r     | CTTCCTCCAAGCACCTGT         |                |
| OsRR6f     | CGTCATCGCCAAGATCCTC        | LOC_Os04g57720 |
| OsRR6r     | CGGGATCTCCTTGAGCTG         |                |
| OsRR7f     | CTGGAGATATTGGGCTCGGAA      | LOC_Os07g26720 |
| OsRR7r     | CGCCTTCTTCCAAGCATC         |                |

**S7 Table (continued). Oligo sequences used for real-time PCR.**

| Name       | Sequence 5'-3'          | Locus ID       |
|------------|-------------------------|----------------|
| OsGA2ox1f  | TACGCCAGCAGCTTCACGG     | LOC_Os05g06670 |
| OsGA2ox1r  | TCCATCAGCTCCAGCGACA     |                |
| OsGA2ox2f  | TTCAGGGCCGTCAACCAC      | LOC_Os01g22920 |
| OsGA2ox2r  | ATTTTGTTCCTGAACCGTCGAG  |                |
| OsGA2ox3f  | TCGTTGCAGGTTCTGACCA     | LOC_Os01g55240 |
| OsGA2ox3r  | CCTGTTGTCTCCAAGCCTT     |                |
| OsGA2ox4f  | CTCCTTCTCGTCATCGTC      | LOC_Os05g43880 |
| OsGA2ox4r  | GCAGCCTTCTTGTACTCCC     |                |
| OsGA2ox5f  | CCAGCACCTCATCGTCA       | LOC_Os07g01340 |
| OsGA2ox5r  | TGCTTCCTGTACTIONCGCCGAA |                |
| OsGA2ox6f  | GACTTCCTACCGTCCTG       | LOC_Os04g44150 |
| OsGA2ox6r  | GCACCTTCTTCTGTACTCC     |                |
| OsKAOf     | CCAAGTTTATCCTGACCCCAA   | LOC_Os06g02019 |
| OsKAOr     | TCGCCAAGCAGTTGTCCA      |                |
| OsKOf      | GTACCTCAACGCCGTCTTCC    | LOC_Os06g37364 |
| OsKOr      | CGCCATCGTCTTGTACATGTCC  |                |
| OsKSf      | CTGCTGCTACCATATTCCCC    | LOC_Os04g52230 |
| OsKSr      | TTTTGTAACATCACGGCCTT    |                |
| OsCPSf     | CTACAGGATGCCAATTGTGA    | LOC_Os02g17780 |
| OsCPSr     | CTCTAGCCCATGCAAGTCG     |                |
| OsGA20ox1f | TACGCCAGCAGCTTCACGG     | LOC_Os03g63970 |
| OsGA20ox1r | TCCATCAGCTCCAGCGACA     |                |
| OsGA20ox2f | GCAACTACTACCCGCCAT      | LOC_Os01g66100 |
| OsGA20ox2r | CAGGCAGCTCTTATACCTCC    |                |
| OsGA20ox3f | CGCTCACCTTCTTCTCAACC    | LOC_Os07g07420 |
| OsGA20ox3r | AGCCATTCTTTGCTTGATCCA   |                |
| OsGA20ox4f | CGCTTCGTCGACAACCTC      | LOC_Os05g34854 |
| OsGA20ox4r | CTGTCTCGAAGAACTCCC      |                |
| OsGA3ox1f  | GATCTCTTCATGTGCTCACC    | LOC_Os05g08540 |
| OsGA3ox1r  | GAATCATGCTCAACGCCGAT    |                |
| OsGA3ox2f  | TCCAAGCTCATGTGGTCCGA    | LOC_Os01g08220 |
| OsGA3ox2r  | TCCTCTCCGCCTCGACTC      |                |
| RGL3f      | GCCCTTCCAGTTCAACCC      | LOC_Os06g10900 |
| RGL3r      | GCCACGATGTTCTTGATCTCC   |                |
| SLR1f      | TGCGGATACTCAACGCCATC    | LOC_Os06g03710 |
| SLR1r      | CAGCTCCTGCCTCGACTC      |                |
| GAIf       | GCCTCGTCCACATTGTCG      | LOC_Os05g40710 |
| GAIr       | CGAAAAACATGCACAGCTTCC   |                |
