# Supplementary material for: The QTL GNP1 Encodes GA20ox1, Which Increases Grain Number and Yield by Increasing Cytokinin Activity in Rice Panicle Meristems
Source: PubMed Central journal article supplement (PMC5072697; doi:10.1371/journal.pgen.1006386), 2016-10-20
Supplement: pgen.1006386.s017.pdf [file pgen.1006386.s017.pdf]

**S8 Table. Oligo sequences used for in situ hybridization.**

| Name         | Sequence 5'-3'                      |
|--------------|-------------------------------------|
| OSH1pSPT18-F | ACGCGAAGCTTGAAGTACAGGGAGGAGCTGACGA  |
| OSH1pSPT18-R | ACGCGTCTAGATAGAGGCCCGTCGTTGATG      |
| GNP1pSPT18-F | ACGCGAAGCTTCGGCTACGCCAGCAGCTTCAC    |
| GNP1pSPT18-R | ACGCGTCTAGAGTTGGAGAGCGCCATGAAGGTGTC |
